# Supplementary material
Source: MDPI journal article supplement (https://www.mdpi.com/2227-9040/12/3/47)
Supplement: s1 [file s1]

# Response Surface Modelling of Six Organic Acids from *Pinellia ternata* (Thunb.) Breit by Ultrasound-Assisted Extraction and Its Determination by High-Performance Liquid Chromatography Coupled to Triple Quadrupole Mass Spectrometry

Lu Wei <sup>1,2,†</sup>, Jinxin Li <sup>1,2,†</sup>, Jingyi Zhang <sup>1,2</sup>, Kaili Qu <sup>1,2</sup>, Mingxing Wang <sup>1,2</sup>, Tingting Ni <sup>1,2</sup>, Yuhuan Miao <sup>1,2</sup>, Ming Luo <sup>1,2</sup>, Shumin Feng <sup>1,2,\*</sup> and Dahui Liu <sup>1,2,\*</sup>

<sup>1</sup> School of Pharmacy, Hubei University of Chinese Medicine, Wuhan 430065, China

<sup>2</sup> Hubei Shizhen Laboratory, Hubei University of Chinese Medicine, Wuhan 430065, China

\* Correspondence: shumin\_f@163.com (S.F.); liudahui@hbtcm.edu.cn (D.L.)

† These authors contributed equally to this work.

**Table S1.** Detailed information of different *Pinellia ternata* samples.

| Sample | Production Regions                                   |
|--------|------------------------------------------------------|
| 1      | Huangshan City, Anhui Province                       |
| 2      | Chongqing City                                       |
| 3      | Xinyang City, Henan Province                         |
| 4      | Baoding City, Hebei Province                         |
| 5      | Qianjiang City, Hubei Province (Red skin variety)    |
| 6      | Qianjiang City, Hubei Province (Yellow skin variety) |
| 7      | Tianmen City, Hubei Province                         |
| 8      | Yichang City, Hubei Province                         |
| 9      | Shiyan City, Hubei Province                          |
| 10     | Huaihua City, Hunan Province                         |
| 11     | Yingtian City, Jiangxi Province                      |
| 12     | Shangluo City, Shanxi Province                       |
| 13     | Wenshan Prefecture, Yunnan Province                  |

**Table S2.** The ANOVA test for the fitted quadratic polynomial model of predictive model.

| Source            | Sum of Squares | Degree of Freedom | Mean Square | F-Value | p Value |
|-------------------|----------------|-------------------|-------------|---------|---------|
| Model             | 218.43         | 9                 | 24.27       | 14.3    | <0.01   |
| Residuals         | 11.88          | 7                 | 1.70        |         |         |
| Lack of fit       | 8.24           | 3                 | 2.75        | 3.03    | 0.1564  |
| Pure error        | 3.63           | 4                 | 0.91        |         |         |
| Total             | 230.31         | 16                |             |         |         |
| CV (%)            |                |                   |             |         | 8.77    |
| R <sup>2</sup>    |                |                   |             |         | 0.9484  |
| Radj <sup>2</sup> |                |                   |             |         | 0.8821  |

**Table S3.** The total organic acid content extracted under the 17 schemes conditions in RSM design and the optimized conditions.

| Extraction Conditions | Organic acid Content (mg/g) |
|-----------------------|-----------------------------|
| 1                     | 19.41±0.15                  |
| 2                     | 18.60±0.17                  |
| 3                     | 11.60±0.02                  |
| 4                     | 17.10±0.05                  |
| 5                     | 16.12±0.05                  |
| 6                     | 15.10±0.15                  |
| 7                     | 15.71±0.52                  |
| 8                     | 18.65±0.19                  |
| 9                     | 10.76±0.15                  |
| 10                    | 9.76±0.05                   |
| 11                    | 12.95±0.07                  |
| 12                    | 13.63±0.07                  |
| 13                    | 10.33±0.04                  |
| 14                    | 19.68±0.27                  |
| 15                    | 9.42±0.04                   |
| 16                    | 20.94±0.23                  |
| 17                    | 12.63±0.09                  |
| 18                    | 21.11±0.54                  |

(Notes: 1–17 is the operation method of RSM design, and 18 is the method after RSM optimization.)
